# Supplementary material
Source: HighWire-hosted journal article supplement (https://erj.ersjournals.com/content/57/4/2003028)
Supplement: inline-supplementary-material-1 [file inline-supplementary-material-1.pdf]

**Supplemental Table 1: Risk factors for prevalent tuberculosis in children**

| <b>Variable</b>                                     | <b>Adjusted Model 1**</b><br>Odds ratio (95% CI)<br>P-value | <b>Adjusted Model 2**</b><br>Odds ratio (95% CI)<br>P-value |
|-----------------------------------------------------|-------------------------------------------------------------|-------------------------------------------------------------|
| Age                                                 |                                                             |                                                             |
| 0 to < 3 years                                      | Ref                                                         | Ref                                                         |
| 3 to < 5 years                                      | 0.71 (0.38, 1.34)                                           | 0.71 (0.39, 1.34)                                           |
| 5 to < 10 years                                     | 0.27 (0.14, 0.52)                                           | 0.27 (0.14, 0.52)                                           |
| 10 to <=15 years                                    | 0.15 (0.05, 0.45)<br><0.0001*                               | 0.16 (0.05, 0.49)<br>0.0001*                                |
| Gender<br><i>Referent: female</i>                   | 0.92 (0.56, 1.52)<br>0.7392                                 | 0.96 (0.58, 1.58)<br>0.8479                                 |
| HIV status<br><i>Referent: not infected</i>         | 3.18 (1.25, 8.08)<br>0.0152                                 | 2.33 (1.04, 5.21)<br>0.0394                                 |
| BCG Scar/History<br><i>Referent: not vaccinated</i> | 1.54 (0.48, 4.95)<br>0.4735                                 | 1.65 (0.51, 5.31)<br>0.4018                                 |
| Tuberculosis contact<br><i>Referent: no contact</i> | 3.97 (1.58, 9.97)<br>0.0033                                 |                                                             |
| Contact Score                                       |                                                             | 1.17 (1.06, 1.30)<br>0.0020                                 |
| Mtb-sir<br><i>Referent: absence of Mtb-sir</i>      | 5.08 (2.85, 9.08)<br><0.0001                                | 4.61 (2.56, 8.29)<br><0.0001                                |

\* joint test of the age group variables; all groups were significantly different (p<0.05) except for 0 to < 3 years vs. 3 to < 5 years and 5 to < 10 years vs. 10 to <= 15 years

**Supplemental Table 2: Effectiveness of isoniazid preventive therapy for the prevention of incident tuberculosis\***

| <b>Variable</b>                                                                       | <b>Adjusted Model 1**</b><br>Odds ratio (95% CI)<br>P-value                    | <b>Adjusted Model 2**</b><br>Odds ratio (95% CI)<br>P-value                    |
|---------------------------------------------------------------------------------------|--------------------------------------------------------------------------------|--------------------------------------------------------------------------------|
| <b>IPT Initiated</b><br><i>Referent: not initiated</i>                                | 0.24 (0.09, 0.63)<br>0.0035                                                    | 0.20 (0.08, 0.54)<br>0.0014                                                    |
| <b>Age</b><br>0 to < 3 years<br>3 to < 5 years<br>5 to < 10 years<br>10 to <=15 years | Ref<br>0.90 (0.37, 2.15)<br>0.18 (0.06, 0.52)<br>0.01 (<0.01, 0.25)<br>0.0011* | Ref<br>0.87 (0.36, 2.09)<br>0.16 (0.42, 1.81)<br>0.01 (<0.01, 0.24)<br>0.0007* |
| <b>Gender</b><br><i>Referent: female</i>                                              | 0.86 (0.42, 1.79)<br>0.6969                                                    | 0.67 (0.42, 1.81)<br>0.7081                                                    |
| <b>HIV status</b><br><i>Referent: not infected</i>                                    | 1.33 (0.43, 4.10)<br>0.6217                                                    | 1.62 (0.56, 4.70)<br>0.3748                                                    |
| <b>BCG Scar/History</b><br><i>Referent: not vaccinated</i>                            | 0.45 (0.12, 1.72)<br>0.2421                                                    | 0.48 (0.12, 1.87)<br>0.2903                                                    |
| <b>Tuberculosis contact</b><br><i>Referent: no contact</i>                            | 1.40 (0.51, 3.87)<br>0.5114                                                    |                                                                                |
| <b>Contact Score</b>                                                                  |                                                                                | 1.14 (0.98, 1.34)<br>0.0983                                                    |
| <b>Mtb-sir-nodis</b><br><i>Referent: Mtb-sir-nodis absent</i>                         | 2.11 (0.96, 4.62)<br>0.0623                                                    | 1.90 (0.86, 4.24)<br>0.1139                                                    |

\* joint test of the age group variables; all groups were significantly different ( $p < 0.05$ ) except for 0 to < 3 years vs. 3 to < 5 years and 5 to < 10 years vs. 10 to <= 15 years
