# Supplementary material
Source: HighWire-hosted journal article supplement (https://erj.ersjournals.com/content/57/4/2003028)
Supplement: inline-supplementary-material-2 [file inline-supplementary-material-2.pdf]

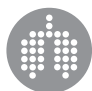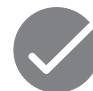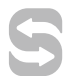

SHAREABLE PDF

# Tuberculosis prevention in children: a prospective community-based study in South Africa

Anna M. Mandalakas <sup>1</sup>, Anneke C. Hesselning<sup>2</sup>, Alexander Kay <sup>1,3</sup>, Karen Du Preez<sup>2</sup>, Leonardo Martinez<sup>4</sup>, Lena Ronge<sup>2</sup>, Andrew DiNardo<sup>1</sup>, Christoph Lange<sup>5,6,7</sup> and H. Lester Kirchner<sup>1,8</sup>

**Affiliations:** <sup>1</sup>Global Tuberculosis Program, Dept of Pediatrics, Baylor College of Medicine and Texas Children's Hospital, Houston, TX, USA. <sup>2</sup>Desmond Tutu TB Centre, Dept of Pediatrics and Child Health, Faculty of Medicine and Health Sciences, Stellenbosch University, Cape Town, South Africa. <sup>3</sup>Baylor College of Medicine Children's Foundation – Eswatini, Mbabane, Swaziland. <sup>4</sup>Division of Infectious Diseases and Geographic Medicine, School of Medicine, Stanford University, Stanford, CA, USA. <sup>5</sup>German Center for Infection Research (DZIF) Clinical Tuberculosis Center, Research Center Borstel, Borstel, Germany. <sup>6</sup>Respiratory Medicine and International Health, University of Lübeck, Lübeck, Germany. <sup>7</sup>Dept of Medicine, Karolinska Institute, Stockholm, Sweden. <sup>8</sup>Dept of Population Health Sciences, Geisinger, Danville, PA, USA.

**Correspondence:** Anna Mandalakas, Global TB Program, 1102 Bates Avenue, FC630, Houston, TX 77030, USA. E-mail: anna.mandalakas@bcm.edu

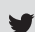

@ERSpublications

**In high TB burden communities, preventive therapy substantially reduces risk of TB among child contacts, especially those who are <5 years of age, living with HIV, recently TB exposed or have a positive *M. tuberculosis*-specific immune response** <https://bit.ly/3dKHpUc>

**Cite this article as:** Mandalakas AM, Hesselning AC, Kay A, *et al.* Tuberculosis prevention in children: a prospective community-based study in South Africa. *Eur Respir J* 2021; 57: 2003028 [<https://doi.org/10.1183/13993003.03028-2020>].

This single-page version can be shared freely online.

**ABSTRACT** Tuberculosis (TB) preventive therapy reduces TB risk in children. However, the effectiveness of TB preventive therapy in children living in high TB burden settings is unclear.

In a prospective observational community-based cohort study in Cape Town, South Africa, we assessed the effectiveness of routine TB preventive therapy in children ≤15 years of age in a high TB and HIV prevalence setting.

Among 966 children (median (interquartile range) age 5.07 (2.52–8.72) years), 676 (70%) reported exposure to an adult with TB in the past 3 months and 240 out of 326 (74%) eligible children initiated isoniazid preventive therapy under programmatic guidelines. Prevalent (n=73) and incident (n=27) TB were diagnosed among 100 out of 966 (10%) children. Children who initiated isoniazid preventive therapy were 82% less likely to develop incident TB than children who did not (adjusted OR 0.18, 95% CI 0.06–0.52; p=0.0014). Risk of incident TB increased if children were <5 years of age, living with HIV, had a positive *Mycobacterium tuberculosis*-specific immune response or recent TB exposure. The risk of incident TB was not associated with sex or *Mycobacterium bovis* bacille Calmette–Guérin vaccination status. Number needed to treat (NNT) was lowest in children living with HIV (NNT=15) and children <5 years of age (NNT=19) compared with children of all ages (NNT=82).

In communities with high TB prevalence, TB preventive therapy substantially reduces the risk of TB among children who are <5 years of age or living with HIV, especially those with recent TB exposure or a positive *M. tuberculosis*-specific immune response in the absence of disease.
